# 1 **Metagenomics reveals novel microbial signatures of farm exposures in** 2 **house dust**

3 **Ziyue Wang<sup>1†</sup>, Kathryn R. Dalton<sup>2†</sup>, Mikyeong Lee<sup>2</sup>, Christine G. Parks<sup>2</sup>, Laura E. Beane**  
4 **Freeman<sup>3</sup>, Qiyun Zhu<sup>4</sup>, Antonio González<sup>5</sup>, Rob Knight<sup>5,6,7,8</sup>, Shanshan Zhao<sup>1</sup>, Alison A**  
5 **Motsinger-Reif<sup>1#</sup>, Stephanie J. London<sup>2#\*</sup>**

6 <sup>1</sup> Biostatistics and Computational Biology Branch, National Institute of Environmental Health  
7 Sciences, National Institutes of Health, Durham, NC, USA

8 <sup>2</sup> Genomics and the Environment in Respiratory and Allergic Health Group, Epidemiology Branch,  
9 National Institute of Environmental Health Sciences, National Institutes of Health, Durham, NC,  
10 USA

11 <sup>3</sup> Occupational and Environmental Epidemiology Branch, Division of Cancer Epidemiology and  
12 Genetics, National Cancer Institute, National Institutes of Health, Bethesda, MD, USA

13 <sup>4</sup> School of Life Sciences, Biodesign Center for Fundamental and Applied Microbiomics, Arizona  
14 State University, Tempe, AZ, USA

15 <sup>5</sup> Department of Pediatrics, University of California San Diego, La Jolla, CA, USA

16 <sup>6</sup> Center for Microbiome Innovation, University of California San Diego, La Jolla, CA, USA

17 <sup>7</sup> Department of Bioengineering, University of California San Diego, La Jolla, CA, USA

18 <sup>8</sup> Department of Computer Science and Engineering, University of California San Diego, La Jolla,  
19 CA, USA

20 <sup>†</sup> Equal contribution co-first authors

21 <sup>#</sup> Co-senior authors

22 **\* Correspondence:**  
23 Stephanie J. London  
24 [london2@niehs.nih.gov](mailto:london2@niehs.nih.gov)

25 **Keywords: indoor microbiome, home dust microbiota, whole genome sequencing, farming**  
26 **environmental exposures, Agricultural Health Study, environmental microbiology.**

## 27 **Abstract**

28 Indoor home dust microbial communities, important contributors to human health outcomes, are  
29 shaped by environmental factors, including farm-related exposures. Detection and characterization of  
30 microbiota are influenced by sequencing methodology; however, it is unknown if advanced  
31 metagenomic whole genome shotgun sequencing (WGS) can detect novel associations between  
32 environmental exposures and the indoor built-environment dust microbiome, compared to  
33 conventional 16S rRNA amplicon sequencing (16S). This study aimed to better depict indoor dust  
34 microbial communities using WGS to investigate novel associations with environmental risk factors

35 from the homes of 781 farmers and farm spouses enrolled in the Agricultural Lung Health Study. We  
36 examined various farm-related exposures, including living on a farm, crop versus animal production,  
37 and type of animal production, as well as non-farm exposures, including home cleanliness and indoor  
38 pets. We assessed the association of the exposures on within-sample alpha diversity and between-  
39 sample beta diversity, and the differential abundance of specific microbes by exposure. Results were  
40 compared to previous findings using 16S. We found most farm exposures were significantly  
41 positively associated with both alpha and beta diversity. Many microbes exhibited differential  
42 abundance related to farm exposures, mainly in the phyla *Actinobacteria*, *Bacteroidetes*, *Firmicutes*,  
43 and *Proteobacteria*. The identification of novel differential taxa associated with farming at the genera  
44 level, including *Rhodococcus*, *Bifidobacterium*, *Corynebacterium*, and *Pseudomonas*, was a benefit  
45 of WGS compared to 16S. Our findings indicate that characterization of dust microbiota, an  
46 important component of the indoor environment relevant to human health, is heavily influenced by  
47 sequencing techniques. WGS is a powerful tool to survey the microbial community that provides  
48 novel insights on the impact of environmental exposures on indoor dust microbiota, and should be an  
49 important consideration in designing future studies in environmental health.

## 50 **1 Introduction**

51 Humans spend 90% of their lives indoors (1), with much of this time spent in the home, where they  
52 both contribute to and are exposed to environmental microbiota. Home dust microbiota are  
53 commonly captured by vacuuming living spaces, including bedrooms. Exposure to bacterial and  
54 fungal communities inside the home has been associated with allergic, atopic, and respiratory  
55 conditions in children and adults (2-5). These associations could reflect the direct impacts of  
56 environmental microbial exposure on inhabitants' health, as well as through indirect effects of dust  
57 microbiota on the human gut, skin, oral, and respiratory microbiomes (6-8). Housing characteristics  
58 and other environmental exposures have been shown to influence indoor microbial communities,  
59 including farm-related exposures (8-11). Living in or near a farm environment entails unique  
60 microbial exposures and subsequent health concerns. Farm exposures have been associated with  
61 altered microbial composition in home dust, which in turn have been associated with allergic  
62 outcomes in adults and children (4, 12-14). Identifying environmental factors that influence home  
63 dust microbiota is a critical first step in determining exposure pathways relevant to health outcomes.

64 The emergence and optimization of high-throughput sequencing have enabled new approaches to  
65 assessing the composition of bacterial communities present in home dust samples, which have a  
66 complex matrix and low microbial biomass compared to host-associated microbiome samples such as  
67 stool. 16S rRNA amplicon sequencing (16S) is a traditional next-generation technique in which all  
68 amplified products are sequenced from a single gene (i.e., the 16S rRNA gene). The technique is  
69 limited, however, because annotation is based on putative associations of the 16S rRNA gene with  
70 bacterial taxa defined computationally as operational taxonomic units (OTUs). Thus, specific  
71 bacterial entities are not directly sequenced, but rather predicted based on OTUs, and consequently  
72 have more uncertainty at the lower taxonomy ranks of genus and species (15-18). Metagenomic  
73 whole genome shotgun sequencing (WGS), in which random fragments of the genome are  
74 sequenced, is an alternative approach and offers a major advantage in that taxa can be more  
75 accurately defined at the genus/species level (16, 19). However, WGS is more expensive and requires  
76 more extensive data processing and analysis (15, 20). Most of the published data on associations of  
77 home dust microbiota with environmental exposures or health outcomes have relied on the older 16S  
78 methodology.

79 Higher taxonomic classification resolution with WGS provides a more comprehensive description of  
80 the microbial community, and may improve the ability to detect novel associations with  
81 environmental risk factors, which is important when considering environmental health pathways. In  
82 human microbial communities, especially the gut microbiome, WGS generally identifies a larger  
83 number of unique phyla and higher overall microbial diversity within samples compared to 16S (16,  
84 19-26). However, results are mixed for environmental samples in water and soil (27, 28). At present,  
85 no research has evaluated sequencing methodology on microbial community characterization in  
86 indoor home dust samples, and how this will impact the upstream associations with farm and non-  
87 farm environmental exposures.

88 In the present study, we analyzed samples from 781 participant homes in the Agricultural Lung  
89 Health Study (ALHS), a study of farmers and their spouses in North Carolina and Iowa, using  
90 advanced WGS methods, and evaluated associations with farm and nonfarm exposures found to be  
91 important in previous work based on 16S, in this cohort and others (4, 8, 29). We considered both  
92 microbial community diversity levels and specific bacterial taxa, in order to determine whether WGS  
93 can provide novel insights into farming environmental exposure pathways, the results of which are  
94 relevant to the design of future research integrating environmental health and microbiology.

## 95 **2 Materials and methods**

### 96 **2.1 Study population and design**

97 ALHS is a case-control study of adult asthma study nested within the Agricultural Health Study  
98 (AHS), a prospective cohort of licensed pesticide applicators, mostly farmers and their spouses,  
99 enrolled between 1993 and 1997 (30). ALHS participants were selected from among AHS  
100 participants who were either farmers or farm spouses in North Carolina (NC) and Iowa (IA) and  
101 completed an AHS telephone follow-up conducted from 2005-2010. ALHS enrolled individuals with  
102 asthma diagnosis and current asthma symptoms or medication use along with individuals with  
103 symptoms and medication use suggesting likely asthma ( $n = 1,223$ ). The comparison group was a  
104 random sample of AHS participants without these criteria ( $n = 2,078$ ). The Supplemental Methods  
105 further details study population selection and inclusion criteria. The Institutional Review Board at the  
106 National Institute of Environmental Health Sciences approved the study. Written informed consent  
107 was obtained from all participants.

### 108 **2.2 Dust sample and environmental exposure data collection**

109 Of the 3,301 ALHS participants, 2,871 received a home visit and had adequate levels of collected  
110 dust from the bedroom (Figure 1), as described in Carnes et al. (31). A trained field technician  
111 vacuumed two 1-yd<sup>2</sup> (0.84-m<sup>2</sup>) areas—one on participants' sleeping surface and one on the floor next  
112 to the bed—for 2 min each with a DUSTREAM Collector (Indoor Biotechnologies Inc.). The  
113 samples were divided into aliquots of 50 mg and stored at  $-20^{\circ}\text{C}$  until DNA processing.

114 During the home visit, information was obtained on environmental factors, including current (past 12  
115 months) farming activities (living on a farm, working with crops, and working with animals), type of  
116 animals raised on the farm (beef or dairy cattle, swine, or poultry) and the presence of indoor pets  
117 (cats and dogs). Field technicians noted the presence of carpeting in the bedroom and ranked overall  
118 home cleanliness on a standardized five-point scale (32). For our analysis, we created a binary  
119 variable comprising poor/lower (score of 1 or 2) or good/higher (score of 3–5) home condition. We  
120 categorized season of dust collection based on the date of the home visit: March 21–June 20 for

121 spring, June 21–September 20 for summer, September 21–December 20 for fall, and December 21–  
122 March 20 for winter.

### 123 **2.3 DNA extraction**

124 A random selection (n=879, including 333 asthma cases) of dust samples were sent for WGS analysis  
125 (Figure 1). DNA extraction is described elsewhere (4). Briefly, DNA was isolated using a MoBio 96  
126 well plate PowerSoil DNA extraction kit (QIAGEN Inc.), as recommended by the manufacturer, with  
127 the modification of loading 0.3-0.5g per dust sample into each well and incubated in PowerSoil bead  
128 solution and C1 buffer at 70°C for 20 min before the beating step to aid in lysis of spores. We  
129 quantified using the NanoDrop (A260) (Thermo Fisher Scientific Inc.) and normalized to 5 ng/L  
130 DNA.

### 131 **2.4 Metagenomic whole genome shotgun sequencing and preprocessing**

132 The University of California San Diego IGM Genomics Center performed library preparation,  
133 multiplexing, and whole genome shotgun sequencing using standard techniques (33). Extracted DNA  
134 was quantified via Qubit™ dsDNA HS Assay (ThermoFisher Scientific). The library size was  
135 selected for fragments between 300 and 700 bp using the Sage Science PippinHT and sequenced as a  
136 paired-end 150-cycle run using an Illumina HiSeq2500 v2 in Rapid Run mode.

137 We performed several quality control steps, which are summarized in Supplementary Figure S1. We  
138 first trimmed low-quality reads, duplicates, and adapters based on FastQC results (v0.11.5) (34). We  
139 then identified and removed reads not from microbial genomes, as potential contaminant host  
140 genomic sources (human, PhiX, cow, pig, chicken, turkey, horse, goat, sheep, dog, cat, and dust mite  
141 genomes) (Supplementary Table S1) using Bowtie2 (35) and KneadData (v0.7.10) (36). We further  
142 assessed the taxonomic classification of sequences using Kraken2 (v2.1.1) (37) and obtained accurate  
143 estimations of abundance using Bracken (v2.5.0) (38) with pre-compiled data comprising RefSeq  
144 genomes for bacteria, archaea, eukaryotes, fungi, viruses, and plasmids and NCBI taxonomy  
145 information. Supplementary Tables S2 and S3 summarize the overall read sequence statistics and  
146 proportion of host genome contaminants across samples. Additionally, we accounted for the potential  
147 introduction of contaminant DNA sequences during sample collection or laboratory processing by  
148 incorporating negative ‘blank’ sequencing controls of sterile water, with contaminants identified and  
149 removed with the decontam R package (v1.10.0) (39). A total of 168 taxa were filtered out  
150 (Supplementary Table S4). Because dust samples have low microbial biomass (fewer microbes), we  
151 performed two sequencing runs, each with separate quality control processes, and then performed  
152 abundance pooling across the two runs. At the sample level, we excluded low-quality samples  
153 defined by sequencing depths less than 1000 (Supplementary Figure S2). Rare taxa were filtered out  
154 if they did not appear in at least 10 samples (Supplementary Figure S2). This quality control pipeline  
155 left 781 samples and 6,528 taxa for downstream analysis. A taxonomy chart was created that  
156 assigned all taxa to a taxonomic classification across the seven phylogenetic levels - kingdom,  
157 phylum, class, order, family, genus, and species. The Supplemental Methods provides details of the  
158 bioinformatic procedures.

### 159 **2.5 Statistical analysis**

160 We performed all statistical analyses and visualization in R (v4.0.3) (40). We rarefied data to the  
161 minimum library size (1,003) across all samples before calculating alpha and beta diversities using  
162 the phyloseq R package (v1.34.0) (41). We considered both non-farming exposures, including state

163 of residence, sex, presence of indoor pets, home condition, and season of dust collection, and farming  
164 exposures in the past 12 months, including living on a farm, crop farming, and animal farming. All  
165 exposures were treated as binary variables. For season of dust collection, we compared one season to  
166 all other seasons combined. We included asthma as a covariate in all models due to the nested case-  
167 control design.

168 To evaluate intra-group alpha diversity and its association with farming and non-farming exposures  
169 we used the Shannon index, exponentially transformed for normality, as the outcome in linear  
170 models. We first fitted a baseline univariable regression model for each exposure to identify  
171 exposures associated with alpha diversity. We also considered whether associations differed by state  
172 of residence (IA or NC) by using product terms. Our final multivariable model included any exposure  
173 with significant association to alpha diversity from the baseline univariable model, along with any  
174 significant product terms for the individual interactions of each exposure with state of residence.  
175 Detailed analytical formula were described in Supplemental methods (SM3). We set  $p < 0.05$  as the  
176 statistical significance threshold for all analyses.

177 To explore beta diversity, we calculated unweighted and weighted UniFrac distance metrics. We  
178 conducted permutational multivariate analysis of variance (PERMANOVA) analysis to test the  
179 differences in microbial community structure across exposure levels using the *adonis* method in the  
180 R *vegan* package (v2.5.7) (42, 43). We used the  $R^2$  value to quantify the percentage of variance  
181 explained. We did similar analysis as alpha diversity to evaluate differences in associations by state.  
182 We conducted non-metric multidimensional scaling (NMDS) analysis to visualize the separation  
183 between samples by exposure levels in a two-dimensional space using the *phyloseq* (v1.34.0) (41)  
184 and R *ggplot2* (v3.3.6) (44) packages.

185 To identify differentially abundant taxa for each exposure, we used analysis of composition of  
186 microbiomes with bias correction (ANCOM-BC, v1.0.5) models (45), which is based on a linear  
187 regression framework on the log transformed taxa counts, with exposures as dependent variables and  
188 sampling fraction as an offset term. To account for variation in sequencing depth, we performed  
189 normalization by estimating the sampling fraction using the ANCOM-BC built-in algorithm. We  
190 tested taxa at the OTU level and summarized the results by genus and phylum rank. We also  
191 calculated the log<sub>2</sub> fold-difference which is the ratio of the mean abundance after normalized by  
192 ANCOM-BC across exposure levels. We controlled the false discovery rate (FDR) at 0.05 with the  
193 Benjamini-Hochberg (BH) method (46). We determined a taxon to be significantly differentially  
194 abundant if it had both  $p < 0.05$  after FDR correction and had log<sub>2</sub> fold-difference larger than 1 or  
195 smaller than -1. We performed sensitivity analyses to evaluate differences in associations by state of  
196 residence.

197 Lee et al. (47) analyzed samples for the same population with 16S rRNA amplicon sequencing. To  
198 examine differences of house dust microbial profile between these two methods, we compared the  
199 taxonomic chart from our WGS data to the previous 16S data to determine the number of unique and  
200 overlapping microbial organisms, at the phyla rank, detected by each sequencing method. We note  
201 how common or rare the uniquely identified phyla were based on the frequency of assigned taxa and  
202 the relative abundance across samples. In addition, we evaluated the differences between alpha  
203 diversities (richness and Shannon index) generated by the two sequencing methods by calculating the  
204 Spearman's correlation coefficient.

### 205 3 Results



### 206 3.1 Summary statistics for the study population and metagenomics characteristics

207 Table 1 summarizes the demographic characteristics and environmental exposures of the study  
208 population. Iowa residents accounted for 68% of samples; North Carolina for 32% (247). Sixty  
209 percent of participants were male. Indoor pets (dogs or cats) were present in 43% of homes. Most  
210 homes (78%) were in good/higher cleanliness, and nearly all had carpeted floors (93%). Overall, 83%  
211 of participants lived on a farm, 56% farmed crops in the past 12 months, and 51% worked with farm  
212 animals in the past 12 months. Of the 401 (51%) participants who reported animal farming, 281  
213 worked with beef cattle, 48 worked with dairy cattle, 120 worked with hogs, and 90 worked with  
214 poultry. Overall, 31% of dust samples were obtained in summer, 25% in spring, 20% in fall, and 23%  
215 in winter. Current asthma was present in 296 (37.9%) participants and the overall mean age of  
216 participants was 62 years (standard deviation 11).

217 After filtering out samples with low sequencing depth and filtering out rare taxa, 781 samples and  
218 6,528 taxa remained for downstream analysis with 183,025,561 reads across all samples. At the  
219 Kingdom phylogenetic level, 5,661 taxa were assigned to Bacteria, 156 to Archaea, 96 to Eukaryota,  
220 and 615 to viruses, with an average of 2,247 ( $\pm 1,226$ ) taxa per sample ( $n=781$ ). Figure 2 outlines the  
221 phylum composition across all samples. Among the 59 phyla identified from WGS, 16 had relative  
222 abundance greater than 1% in at least one sample (Figure 2, Supplementary Table S5). Phyla  
223 *Firmicutes*, *Proteobacteria*, *Actinobacteria*, and *Bacteroidetes* were the most prominent among home  
224 dust microbial communities. At lower taxonomy rank, 1789 unique genera were identified, where 36  
225 had relative abundance greater than 10% in at least one sample. The five most abundant genera were  
226 *Mycobacterium*, *Serratia*, *Toxoplasma*, *Lactobacillus*, and *Alcaligenes* (Supplementary Table S6).

### 227 3.2 House dust microbial community diversity analysis

228 Figure 3 shows the association between alpha diversity and each exposure. The presence of indoor  
229 pets and farming status (living on a farm, crop farming, animal farming with beef cattle, hogs, and  
230 poultry) were positively associated with alpha diversity, while good/higher home cleanliness was  
231 negatively associated with alpha diversity ( $p < 0.050$ ). State of residence had a suggestive significant  
232 association with alpha diversity with  $p = 0.057$ . In our multivariable primary model including all  
233 statistically significant exposures and all significant interaction terms with state of residence, living  
234 on a farm and animal farming remained significantly positively related to alpha diversity  
235 (Supplementary Table S7).

236 For beta-diversity, PERMANOVA analysis revealed significant differences in beta diversity for all  
237 demographic characteristics and exposure levels based on unweighted UniFrac distance although the  
238 percent variance explained by the exposure groups ( $R^2$  values) were small (Supplementary Figure  
239 S3). Current farming accounted for relatively greater explained microbial diversity variance (0.5%  
240 for crop farming and 0.7% for animal farming) compared to other farm and nonfarm exposures  
241 (Figure 4a, 4b). The differences in the microbial composition of home dust samples by state of  
242 residence explained around 1% of the variance of bacterial communities ( $p = 0.001$ ) (Figure 4c). The  
243 results with weighted UniFrac distance were similar to unweighted metric (Supplementary Figure  
244 S4).

### 245 3.3 Differential abundance analysis of individual taxa

246 There were 372 unique taxa belonging to 175 genera within 16 unique phyla, that were differentially  
247 abundant in relation to at least one exposure (Supplementary Table S8, Supplementary Table S9,  
248 Supplementary Figure S5). Animal farming and living on a farm were associated with more

249 differentially abundant taxa than non-farming exposures. Figure 5 includes volcano plots of  
250 differentially abundant taxa related to the presence of indoor pets, living on a farm, crop farming, and  
251 animal farming in the past 12 months, color coded by phylum. The top 10 taxa based on FDR values  
252 are labeled by their genus rank. Working with hogs was identified with the greatest number of  
253 differentially abundant taxa compared with other types of farming animals (Figure 5a, Supplementary  
254 Figure S5).

255 Living on a farm was associated with differential abundance of 101 taxa (increased abundance for  
256 100 taxa and decreased abundance for one taxon in genus *Dickeya*), which were mainly in phylum  
257 *Actinobacteria*, *Bacteroidetes*, *Firmicutes*, and *Proteobacteria* (Figure 5b). Among the top 10 taxa,  
258 two were in genus *Bifidobacterium*. The 26 differentially abundant taxa all had increased abundance  
259 related to crop farming were mainly in phyla *Actinobacteria*, *Firmicutes*, and *Proteobacteria* (Figure  
260 5c). The most significant taxa were genus *Methanobrevibacter* and *Jeotgalibaca*. Animal farming  
261 was associated with increased abundance for 191 taxa and decreased abundance for one taxon in  
262 phylum *Firmicutes* (Figure 5d). Genera *Methanobrevibacter*, *Jeotgalibaca*, *Corynebacterium*,  
263 *Chryseobacterium*, *Glutamicibacter*, *Pseudomonas*, and *Rhodococcus* were among the top 10 taxa.  
264 Forty-nine taxa were differentially abundant for the presence of indoor pets, mostly in phylum  
265 *Actinobacteria*, *Bacteroidetes*, *Firmicutes*, *Fusobacteria*, and *Proteobacteria* (Figure 5e). The taxa  
266 with the smallest FDR value were genus *Frederiksenia* and *Poerphyromonas*. Only a few  
267 differentially abundant taxa belonging to phylum *Proteobacteria* were related to the season of dust  
268 collection (Supplementary Table S8, Supplementary Figure S5).

269 Many differentially abundant taxa were shared among exposures, but there were some taxa uniquely  
270 related to individual farming exposures (Figure 6, Supplementary Table S9). In particular, there were  
271 103 taxa assigned to 67 genera within 7 phyla (*Proteobacteria*, *Actinobacteria*, *Bacteroidetes*,  
272 *Euryarchaeota*, *Firmicutes*, *Tenericutes*, *Chloroflexi*) specific to animal farming. For crop farming, 2  
273 taxa were unique – *Tatumella citrea* in phylum *Proteobacteria* and *Fusarium graminearum* in  
274 phylum *Ascomycota* (Supplementary Table S9). There were only 4 taxa (*Bacillus* [*Firmicute* phyla],  
275 *Campylobacter* [*Proteobacteria*], *Streptomyces* [*Actinobacteria*], and *Acholeplasma* [*Tenericutes*])  
276 that were identified to be associated with both animal farming and crop farming (Supplementary  
277 Table S9). In terms of specific type of farm animals, 89 taxa were unique to hogs, including  
278 *Clostridium*, *Campylobacter*, *Pseudomonas*, and *Streptococcus suis*, 14 unique to poultry, including  
279 *Enterococcus*, *Brucella*, and *Escherichia* genera, 5 unique to dairy cattle, including *Mycoplasma* and  
280 *Acinetobacter*, and 26 unique to beef cattle, including *Corynebacterium* and *Bacillus* (Supplementary  
281 Table S9). Several taxa were identified in multiple types of farming animals: 15 taxa were shared for  
282 hogs, beef cattle and dairy cattle, only one taxon (*Carnobacterium sp.\_CPI*) were common among  
283 hogs, poultry, and beef cattle, and 24 taxa including *Methanobrevibacterium* was related to either  
284 cattle type (Figure 6, Supplementary Table S9).

285 As for non-farming exposures, 44 taxa were uniquely differentially abundant for presence of indoor  
286 pets, including animal-related *Staphylococcus* species *pseudintermedius* and *felis*. Additionally, 4  
287 taxa were unique to home condition, 16 unique to carpeting, and 3 unique to spring dust collection  
288 (Supplementary Table S9).

### 289 3.4 Sensitivity Analysis by State of Residence

290 For interaction effects by state of residence with either alpha or beta diversity, only sex, home  
291 condition, crop farming, general animal farming, beef cattle farming, and spring dust collection had  
292 significant interactions, but most effect sizes were minimal (Supplementary Table S10,

293 Supplementary Table S11, Supplementary Table S12). Therefore, we did not carry interaction  
294 products into the differential abundance analysis. When stratifying by state of residence, several  
295 exposures, including the presence of indoor pets, living on a farm, and general animal farming, were  
296 significantly associated with either alpha or beta diversity in Iowa, where about 2/3 of participants  
297 resided but not in North Carolina which has a much smaller sample size (Supplementary Table S13,  
298 Supplementary Table S14). Fourteen phyla were consistent for both states with differentially  
299 abundant taxa by at least one exposure (Supplementary Table S8, Supplementary Figure S6,  
300 Supplementary Figure S7).

### 301 **3.5 Additional findings with WGS from 16S rRNA sequencing results**

302 WGS data identified many more taxa and phyla than 16S rRNA. The 6,526 taxa identified by WGS  
303 data were assigned to 59 phyla, compared to 1,346 taxa from 18 phyla for 16S. The three phyla with  
304 the largest proportion of taxa assignment (most frequent) for WGS results (*Proteobacteria*,  
305 *Actinobacteria*, *Firmicutes*) were identical for 16S results. Among the 18 phyla identified from 16S  
306 sequencing, 17 were present in the WGS results (Figure 7, Supplementary Table S5). 47 phyla were  
307 uniquely identified by WGS, of which the most frequent phyla were *Uroviricota* with 518 (7.9%)  
308 taxa assigned, *Ascomycota* with 51 (0.8%) taxa assigned, *Spirochaetes* with 38 (0.6%) taxa assigned,  
309 *Cossaviricota* with 35 (0.5%) taxa assigned, and *Apicomplexa* with 25 (0.4%) taxa assigned  
310 (Supplementary Table S5). Additionally, many of the unique phyla in WGS were not rare, including  
311 *Apicomplexa* with average relative abundance across all samples at 3%, and *Ascomycota*,  
312 *Cossaviricota*, *Basidiomycota*, *Nucleocytoviricota*, and *Uroviricota* at 2% each (Supplementary  
313 Table S5). When examining differences in the alpha diversity of results from WGS and 16S  
314 sequencing, Spearman's correlation coefficient for richness ( $\rho=0.413$ ,  $p<2.2e-16$ ) and the Shannon  
315 index ( $\rho=0.355$ ,  $p<2.2e-16$ ) were moderate.

316 Because more microbial organisms were detected by WGS, we observed additional associations with  
317 farming exposures compared to 16S data presented by Lee et al. (39). Notably, a unique phylum  
318 (*Ascomycota*) detected only by WGS was significantly associated with crop farming. One of phyla  
319 identified by both WGS and 16S (*Tenericutes*) had differentially abundant taxa based on animal  
320 farming using WGS not with 16S (Supplementary Table S5, Supplementary Table S8). In addition,  
321 WGS provided the ability to assign taxa to genus taxonomic levels, including the 175 genera with  
322 differential abundance taxa related to at least one exposure (Supplementary Table S8), compared to  
323 16S results at the phyla and family level. Of 175 genera, 16 had relative abundance greater than 10%  
324 in at least one sample including *Lactobacillus*, *Staphylococcus*, and *Bacillus* (Supplementary Table  
325 S6, Supplementary Table S8).

## 326 **4 Discussion**

327 In this study, we evaluated the associations between farming exposures and house dust microbiota  
328 using the whole genome shotgun sequencing method in a US agricultural population. Our results  
329 indicate that both indoor microbial diversity and composition in homes differ in relation to current  
330 farming exposures; living on a farm, and crop and animal farming were associated with increased  
331 within-sample microbial diversity levels and altered microbial composition. Expanding on our  
332 previous findings performed with 16S rRNA gene amplicon sequencing, we identified four times  
333 more unique microbial taxa. The improved detection of unique taxa with WGS enabled us to detect  
334 novel associations between farm exposures and increased abundance of specific microbes including  
335 *Rhodococcus*, *Bifidobacterium*, *Corynebacterium*, and *Pseudomonas*. Enhanced identification of



336 factors that impact the indoor microbiome can improve understanding of environmental exposure  
337 pathways relevant to human health.

338 A unique aspect of this study was the use of the whole genome shotgun sequencing technique,  
339 compared to many previous home dust microbiome studies that use the 16S rRNA amplicon  
340 sequencing technique (4, 12). This work is the first reported to use WGS to evaluate farm exposures  
341 in home dust microbiota. WGS has the advantage of sequencing the entire microbial genome, versus  
342 just a single gene, which can more accurately assign taxonomic classifications (48). In this study, the  
343 use of WGS identified more unique microbial phyla – 42 phyla were found only using WGS,  
344 including both common and rare taxa, versus only one phylum using the 16S technique. Detection of  
345 a greater number of unique phyla from WGS compared to 16S enables better characterization of the  
346 mixed, complex microbial composition of indoor dust in homes. Consequently, we observed novel  
347 environmental exposure associations with the newly detected microbial outcomes from this more  
348 comprehensive WGS method. Expanded taxonomic detection and depiction, as well as the  
349 development of updated, robust bioinformatic and statistical tools for metagenomic data (49), will  
350 then have downstream effects on the interpretation of association to environmental exposures.

351 Consistent with findings using 16S, our data with WGS found that numerous bacteria were  
352 associated with environmental exposures across various phyla. At the phyla level, *Actinobacteria*,  
353 *Bacteroidetes*, *Firmicutes*, and *Proteobacteria* were positively associated with farm exposures,  
354 including living on a farm and crop and animal farming. These trends are similar to our findings  
355 using 16S, which found *Firmicutes* and *Proteobacteria* to be associated with farm exposures. In  
356 previous research, these phyla have been associated with various health conditions, such as asthma,  
357 atopy, and cardiometabolic outcomes (50-52). However, our 16S findings found that crop farming  
358 was associated with significant decreased abundance of taxa in 16 of the 19 phyla (4), compared to  
359 using WGS, where all 26 of our significantly associated taxa had an increased abundance with crop  
360 farming. Complementary studies evaluating home dust in Germany and Finland (12) and classroom  
361 dust in China (53) have found positive associations between nearby farm exposure and increased  
362 abundance of *Proteobacteria* (also known as *Alphaproteobacteria*) and *Actinobacteria*.

363 WGS enables improved classification of microbial taxa at lower taxonomic levels, including the  
364 identification of genera that are differentially abundant by environmental exposures. Using WGS, we  
365 ascertained genera that were associated with our farming exposures, including *Rhodococcus*,  
366 *Bifidobacterium*, *Corynebacterium*, and *Pseudomonas*. *Rhodococcus* and *Corynebacterium*, gram-  
367 positive bacteria, and *Pseudomonas*, a gram-negative bacterium, are found commonly in  
368 environmental sources (54-56). Certain strains of each can be pathogenic in immunocompromised  
369 individuals (54-56), and their abundance has been shown to be elevated in dust from children with  
370 asthma and atopy (57). *Pseudomonas* was also found to be increased using WGS in classroom dust  
371 samples in rural regions near farms compared to suburban areas in China (53). Interestingly,  
372 *Rhodococcus*, *Pseudomonas*, and *Methylobacterium* (another microbe positively associated with  
373 farm exposures in our data) have been previously identified in agricultural settings, where they can  
374 be bioremediation agents and degrade certain pesticides (58). *Bifidobacterium* is ubiquitous in the  
375 human and animal gastrointestinal tract and is associated with positive gut homeostasis, inhibition of  
376 pathogen colonization, and modulation of the local and systemic immune system (59, 60). We  
377 observed that *Methanobrevibacter* and *Jeotgalibaca*, both previously associated with cattle rumen  
378 and manure fermentation (61, 62), were increased with crop and animal farming, and unique to dairy  
379 and beef cattle farming, which is consistent with previous studies evaluating farm exposures in  
380 human microbial communities (12, 63, 64). Two taxa unique to crop farming, *Tatumella citrea* and  
381 *Fusarium graminearum*, are pathogens associated with grain production (65, 66). Reassuringly, we

382 noted an increased abundance of microbes specific to farm and companion animals associated with  
383 concurrent exposure to those animals, such as *Streptococcus suis* with hog farming exposure (67) and  
384 *Staphylococcus pseudintermedius* and *felis* with dog and cat exposure (68, 69).

385 Our findings suggest that the home dust microbial diversity levels differ between participants  
386 exposed to farming activities, as well as pets, both for alpha and beta diversity levels. Overall, the  
387 findings from this study were generally similar to those performed previously using 16S (4). For  
388 microbial composition beta diversity, we found distinct microbial community structure based on farm  
389 and non-farm exposures, which was significant for all explored variables, similar to results from 16S.  
390 The coefficient-of-determination R-squared (R<sup>2</sup>) statistic was greater using 16S, which supports the  
391 hypothesis that WGS resulted in more diverse microbial community identification with greater  
392 heterogeneity, so the same exposure would account for less of the variability. Both WGS and 16S  
393 findings had low R<sup>2</sup> explained variance, consistent with previous research (70). Both analyses  
394 showed positive associations between alpha diversity and crop and animal farming. Living on a farm  
395 was a significant factor using WGS but not 16S. In addition, there were differences based on the type  
396 of animal production, with hog production having a positive association using WGS but not 16S, and  
397 dairy cattle production having a positive association using 16S but not WGS (although there was a  
398 positive trend).

399 The differences in associations between exposures and Shannon alpha diversity in the WGS  
400 compared to our previous 16S data are to be expected given differences between the methods and  
401 batch effects when comparing two different methods run three years apart in different laboratories.  
402 Alpha diversity was slightly higher in WGS than 16S samples with moderate correlation (Spearman's  
403 rho=0.36); unsurprisingly, as a greater number of unique microbes were identified with WGS and is  
404 similar to previous research on environmental samples (19). The discrepancies in measurements and  
405 effect sizes between WGS and 16S can lead to altered interpretations regarding risk factors for  
406 dysbiosis in home dust microbial composition and highlights the importance of how the processing of  
407 microbiome samples can impact downstream analyzes.

408 The positive associations with farm exposures and alpha diversity reinforce trends observed in other  
409 literature (3, 10, 12, 14, 53), in addition to our prior 16S analyses (4). In a study of 203 homes in  
410 Finland and Germany, homes located on farms had significantly higher indoor microbial richness and  
411 diversity compared to rural non-farm home indoor dust, which was associated with decreased asthma  
412 risk in child inhabitants (12). Amin et.al. reported that airborne bacterial diversity was more abundant  
413 in farmer's indoor environment than in suburban homes (10). Using WGS, a study in Shanxi  
414 Providence, China, found higher microbial diversity in schools in rural area near farms compared to  
415 urban non-farm schools (53).

416 A limitation of this work is that we only have a single dust sample per household, collected in the  
417 bedroom. Thus, we assume the sample reflects the normal home condition. To the extent that  
418 microbial composition differs across the household (11), this may not be true. However, people  
419 spend about a third of their time in the bedroom, making this a logical single sampling location. This  
420 limitation would be expected to lead to nondifferential misclassification of exposure and a bias  
421 toward the null. Our work benefits from an advanced next-generation technique, whole genome  
422 shotgun sequencing, to explore the impact of detailed farm exposures on the indoor microbiome in a  
423 large sample size compared to previous studies. The improved detection from WGS across novel  
424 phyla at the genus level adds insights on factors influencing the built environment microbiota, which  
425 plays a key component on host microbiome composition and subsequent health outcomes. Future  
426 investigations on the functional capabilities of the dust microbiota, such as presence of antibiotic

427 resistance genes, can help better understand human health and disease etiology caused by  
428 environmental exposures.

## 429 **5 Conclusions**

430 We evaluated a comprehensive set of factors related to farming to determine their influence on home  
431 dust microbiome assessed using state of the art whole genome shotgun sequencing. The increased  
432 identification by WGS of microbial entities led to detection of associations missed using older 16S  
433 technology. Identifying significant predictors of indoor built environmental microbiota is an  
434 important element in understanding environmental exposure health pathways. The use of advanced  
435 whole genome shotgun sequencing techniques produced novel insights into these health pathways  
436 and may be considered an optimal metagenomic method for future environmental health studies.

## 437 **6 Conflict of Interest**

438 The authors declare that the research was conducted in the absence of any commercial or financial  
439 relationships that could be construed as a potential conflict of interest.

## 440 **7 Author Contributions**

441 SL and ML were responsible for study design and data acquisition. CP and LF initiated ALHS study  
442 and were responsible for the sample collection. ZW designed and performed all bioinformatics and  
443 statistical analysis, with SZ, AM, KD, SL and ML providing analytical input. QZ, AG and RK  
444 planned shotgun metagenomics sequencing and prepared raw sequences data. ZW and KD  
445 formulated the research ideas and drafted the manuscript. All authors contributed to the interpretation  
446 of results and editing of the manuscript.

## 447 **8 Funding**

448 This work was supported by the Intramural Research Program of the National Institutes of Health  
449 (NIH), the National Institute of Environmental Health Sciences (NIEHS) (Z01-ES049030 and Z01-  
450 ES102385), the National Cancer Institute (Z01-CP010119B), and by American Recovery and  
451 Reinvestment Act funds.

## 452 **9 Ethics**

453 The Institutional Review Board at the National Institute of Environmental Health Sciences approved  
454 the study. Written informed consent was obtained from all participants.

## 455 **10 Acknowledgments**

456 This work was supported by the Intramural Research Program of the National Institutes of Health  
457 (NIH), the National Institute of Environmental Health Sciences (NIEHS) (Z01-ES049030 and Z01-  
458 ES102385), the National Cancer Institute (Z01-CP010119B), and by American Recovery and  
459 Reinvestment Act funds. The Center for Microbiome Innovation at the University of California San  
460 Diego provided support by generating sequencing data. We appreciate all the study participants for  
461 their contribution to this research. We thank Drs. F. Day of NIEHS for expert computational  
462 assistance and J. Hoppin (North Carolina State University, Raleigh, NC) for her important  
463 contribution to the Agricultural Lung Health Study during her tenure at NIEHS. We thank Dr. Gail

464 Ackermann of UCSD for assistance with metadata curation, and Dr. Greg Humphrey for laboratory  
465 processing.

## 466 **11 Supplementary Material**

467 See Supplemental Materials Table of Contents document for a list of the supplementary methods,  
468 tables, and figures referenced.

## 469 **12 Data Availability Statement**

470 The raw sequencing data presented in this study are stored in online platform Qiita. Contact the  
471 corresponding author for permission for the raw sequence data and metadata.

## 472 **References**

- 473 1. U.S. Environmental Protection Agency. Report to Congress on indoor air quality. 1989.  
474 Contract No.: EPA/400/1-89/001C.
- 475 2. Ege MJ, Mayer M, Normand AC, Genuneit J, Cookson WO, Braun-Fahrländer C, et al.  
476 Exposure to environmental microorganisms and childhood asthma. *N Engl J Med.* 2011;364(8):701-  
477 9.
- 478 3. Stein MM, Hrusch CL, Gozdz J, Igartua C, Pivniouk V, Murray SE, et al. Innate Immunity  
479 and Asthma Risk in Amish and Hutterite Farm Children. *New England Journal of Medicine.*  
480 2016;375(5):411-21.
- 481 4. Lee MK, Carnes MU, Butz N, Azcarate-Peril MA, Richards M, Umbach DM, et al.  
482 Exposures Related to House Dust Microbiota in a U.S. Farming Population. *Environ Health Perspect.*  
483 2018;126(6).
- 484 5. Dannemiller KC, Gent JF, Leaderer BP, Peccia J. Indoor microbial communities: Influence  
485 on asthma severity in atopic and nonatopic children. *Journal of Allergy and Clinical Immunology.*  
486 2016;138(1):76-83.e1.
- 487 6. Gupta S, Hjelmsø MH, Lehtimäki J, Li X, Mortensen MS, Russel J, et al. Environmental  
488 shaping of the bacterial and fungal community in infant bed dust and correlations with the airway  
489 microbiota. *Microbiome.* 2020;8(1):115.
- 490 7. Lax S, Smith DP, Hampton-Marcell J, Owens SM, Handley KM, Scott NM, et al.  
491 Longitudinal analysis of microbial interaction between humans and the indoor environment. *Science.*  
492 2014;345(6200):1048-52.
- 493 8. Dannemiller KC, Gent JF, Leaderer BP, Peccia J. Influence of housing characteristics on  
494 bacterial and fungal communities in homes of asthmatic children. *Indoor Air.* 2016;26(2):179-92.
- 495 9. Panthee B, Gyawali S, Panthee P, Techato K. Environmental and Human Microbiome for  
496 Health. *Life.* 2022;12(3):456.
- 497 10. Amin H, Santl-Temkiv T, Cramer C, Vestergaard DV, Holst GJ, Elholm G, et al. Cow  
498 Farmers' Homes Host More Diverse Airborne Bacterial Communities Than Pig Farmers' Homes and  
499 Suburban Homes. *Front Microbiol.* 2022;13:883991.
- 500 11. Zhou JC, Wang YF, Zhu D, Zhu YG. Deciphering the distribution of microbial communities  
501 and potential pathogens in the household dust. *Sci Total Environ.* 2023:162250.
- 502 12. Kirjavainen PV, Karvonen AM, Adams RI, Täubel M, Roponen M, Tuoresmäki P, et al.  
503 Farm-like indoor microbiota in non-farm homes protects children from asthma development. *Nature*  
504 *Medicine.* 2019;25(7):1089-95.



- 505 13. Lee MK, Wyss AB, Carnes MU, Richards M, Parks CG, Beane Freeman LE, et al. House  
506 dust microbiota in relation to adult asthma and atopy in a US farming population. *Journal of Allergy*  
507 *and Clinical Immunology*. 2021;147(3):910-20.
- 508 14. Birzele LT, Depner M, Ege MJ, Engel M, Kublik S, Bernau C, et al. Environmental and  
509 mucosal microbiota and their role in childhood asthma. *Allergy*. 2017;72(1):109-19.
- 510 15. Breitwieser FP, Lu J, Salzberg SL. A review of methods and databases for metagenomic  
511 classification and assembly. *Briefings in Bioinformatics*. 2019;20(4):1125-36.
- 512 16. Laudadio I, Fulci V, Palone F, Stronati L, Cucchiara S, Carissimi C. Quantitative Assessment  
513 of Shotgun Metagenomics and 16S rDNA Amplicon Sequencing in the Study of Human Gut  
514 Microbiome. *OMICS*. 2018;22(4):248-54.
- 515 17. Campanaro S, Treu L, Kougias PG, Zhu X, Angelidaki I. Taxonomy of anaerobic digestion  
516 microbiome reveals biases associated with the applied high throughput sequencing strategies.  
517 *Scientific Reports*. 2018;8(1).
- 518 18. Fouhy F, Clooney AG, Stanton C, Claesson MJ, Cotter PD. 16S rRNA gene sequencing of  
519 mock microbial populations- impact of DNA extraction method, primer choice and sequencing  
520 platform. *BMC Microbiology*. 2016;16(1).
- 521 19. Tessler M, Neumann JS, Afshinnekoo E, Pineda M, Hersch R, Velho LFM, et al. Large-scale  
522 differences in microbial biodiversity discovery between 16S amplicon and shotgun sequencing. *Sci*  
523 *Rep*. 2017;7(1):6589.
- 524 20. Durazzi F, Sala C, Castellani G, Manfreda G, Remondini D, De Cesare A. Comparison  
525 between 16S rRNA and shotgun sequencing data for the taxonomic characterization of the gut  
526 microbiota. *Sci Rep*. 2021;11(1):3030.
- 527 21. Ranjan R, Rani A, Metwally A, McGee HS, Perkins DL. Analysis of the microbiome:  
528 Advantages of whole genome shotgun versus 16S amplicon sequencing. *Biochem Biophys Res*  
529 *Commun*. 2016;469(4):967-77.
- 530 22. Clooney AG, Fouhy F, Sleator RD, O' Driscoll A, Stanton C, Cotter PD, et al. Comparing  
531 Apples and Oranges?: Next Generation Sequencing and Its Impact on Microbiome Analysis. *PLOS*  
532 *ONE*. 2016;11(2):e0148028.
- 533 23. Tedersoo L, Anslan S, Bahram M, Pölme S, Riit T, Liiv I, et al. Shotgun metagenomes and  
534 multiple primer pair-barcode combinations of amplicons reveal biases in metabarcoding analyses of  
535 fungi. *MycKeys*. 2015;10:1-43.
- 536 24. Chan TF, Ji KM, Yim AK, Liu XY, Zhou JW, Li RQ, et al. The draft genome, transcriptome,  
537 and microbiome of *Dermatophagoides farinae* reveal a broad spectrum of dust mite allergens. *J*  
538 *Allergy Clin Immunol*. 2015;135(2):539-48.
- 539 25. Logares R, Sunagawa S, Salazar G, Cornejo-Castillo FM, Ferrera I, Sarmiento H, et al.  
540 Metagenomic 16S rDNA Illumina tags are a powerful alternative to amplicon sequencing to explore  
541 diversity and structure of microbial communities. *Environmental Microbiology*. 2014;16(9):2659-71.
- 542 26. Guo J, Cole JR, Zhang Q, Brown CT, Tiedje JM. Microbial Community Analysis with  
543 Ribosomal Gene Fragments from Shotgun Metagenomes. *Appl Environ Microbiol*. 2016;82(1):157-  
544 66.
- 545 27. Poretsky R, Rodriguez RL, Luo C, Tsementzi D, Konstantinidis KT. Strengths and limitations  
546 of 16S rRNA gene amplicon sequencing in revealing temporal microbial community dynamics. *PLoS*  
547 *One*. 2014;9(4):e93827.
- 548 28. Fierer N, Leff JW, Adams BJ, Nielsen UN, Bates ST, Lauber CL, et al. Cross-biome  
549 metagenomic analyses of soil microbial communities and their functional attributes. *Proc Natl Acad*  
550 *Sci U S A*. 2012;109(52):21390-5.
- 551 29. Sitarik AR, Havstad S, Levin AM, Lynch SV, Fujimura KE, Ownby DR, et al. Dog  
552 introduction alters the home dust microbiota. *Indoor Air*. 2018;28(4):539-47.

- 553 30. Alavanja MC, Sandler DP, McMaster SB, Zahm SH, McDonnell CJ, Lynch CF, et al. The  
554 Agricultural Health Study. *Environ Health Perspect.* 1996;104(4):362-9.
- 555 31. Carnes MU, Hoppin JA, Metwali N, Wyss AB, Hankinson JL, O'Connell EL, et al. House  
556 Dust Endotoxin Levels Are Associated with Adult Asthma in a U.S. Farming Population. *Ann Am  
557 Thorac Soc.* 2017;14(3):324-31.
- 558 32. Arbes SJ, Jr., Cohn RD, Yin M, Muilenberg ML, Burge HA, Friedman W, et al. House dust  
559 mite allergen in US beds: results from the First National Survey of Lead and Allergens in Housing. *J  
560 Allergy Clin Immunol.* 2003;111(2):408-14.
- 561 33. Sanders JG, Nurk S, Salido RA, Minich J, Xu ZZ, Zhu Q, et al. Optimizing sequencing  
562 protocols for leaderboard metagenomics by combining long and short reads. *Genome Biol.*  
563 2019;20(1):226.
- 564 34. Babraham Institute. *FastQC.* 2010.
- 565 35. Langmead B, Salzberg SL. Fast gapped-read alignment with Bowtie 2. *Nat Methods.*  
566 2012;9(4):357-9.
- 567 36. Beghini F, McIver LJ, Blanco-Míguez A, Dubois L, Asnicar F, Maharjan S, et al. Integrating  
568 taxonomic, functional, and strain-level profiling of diverse microbial communities with bioBakery 3.  
569 *Elife.* 2021;10.
- 570 37. Wood DE, Lu J, Langmead B. Improved metagenomic analysis with Kraken 2. *Genome Biol.*  
571 2019;20(1):257.
- 572 38. Lu J, Breitwieser FP, Thielen P, Salzberg SL. Bracken: estimating species abundance in  
573 metagenomics data. *PeerJ Computer Science.* 2017;3:e104.
- 574 39. Davis NM, Proctor DM, Holmes SP, Relman DA, Callahan BJ. Simple statistical  
575 identification and removal of contaminant sequences in marker-gene and metagenomics data.  
576 *Microbiome.* 2018;6(1):226.
- 577 40. R Core Team. *R: a language and environment for statistical computing.* Vienna, Austria: R  
578 Foundation for Statistical Computing; 2020.
- 579 41. McMurdie PJ, Holmes S. phyloseq: an R package for reproducible interactive analysis and  
580 graphics of microbiome census data. *PLoS One.* 2013;8(4):e61217.
- 581 42. Anderson MJ. *Permutational multivariate analysis of variance (PERMANOVA).* Wiley  
582 statsref: statistics reference online. 2014:1-15.
- 583 43. Oksanen J, Simpson GL, Blanche FG, Kindt R, Legendre P, Minchin PR, et al. *Community  
584 ecology package. R package version.* 2013;2(0):321-6.
- 585 44. Wickham H. *ggplot2: Elegant Graphics for Data Analysis: Springer; 2016.*
- 586 45. Lin H, Peddada SD. Analysis of compositions of microbiomes with bias correction. *Nat  
587 Commun.* 2020;11(1):3514.
- 588 46. Benjamini Y, Hochberg Y. Controlling the false discovery rate: a practical and powerful  
589 approach to multiple testing. 1995. p. 289-300.
- 590 47. Lee MK, Carnes MU, Butz N, Azcarate-Peril MA, Richards M, Umbach DM, et al.  
591 *Exposures Related to House Dust Microbiota in a U.S. Farming Population. Environ Health Perspect.*  
592 2018;126(6):067001.
- 593 48. Rausch P, Rühlemann M, Hermes BM, Doms S, Dagan T, Dierking K, et al. Comparative  
594 analysis of amplicon and metagenomic sequencing methods reveals key features in the evolution of  
595 animal metaorganisms. *Microbiome.* 2019;7(1).
- 596 49. Berg G, Rybakova D, Fischer D, Cernava T, Verges MC, Charles T, et al. Microbiome  
597 definition re-visited: old concepts and new challenges. *Microbiome.* 2020;8(1):103.
- 598 50. Lynch SV, Wood RA, Boushey H, Bacharier LB, Bloomberg GR, Kattan M, et al. Effects of  
599 early-life exposure to allergens and bacteria on recurrent wheeze and atopy in urban children. *Journal  
600 of Allergy and Clinical Immunology.* 2014;134(3):593-601.e12.

- 601 51. Abrahamsson TR, Jakobsson HE, Andersson AF, Björkstén B, Engstrand L, Jenmalm MC.  
602 Low diversity of the gut microbiota in infants with atopic eczema. *Journal of Allergy and Clinical*  
603 *Immunology*. 2012;129(2):434-40.e2.
- 604 52. Ley RE, Turnbaugh PJ, Klein S, Gordon JI. Human gut microbes associated with obesity.  
605 *Nature*. 2006;444(7122):1022-3.
- 606 53. Fu X, Ou Z, Zhang M, Meng Y, Li Y, Wen J, et al. Indoor bacterial, fungal and viral species  
607 and functional genes in urban and rural schools in Shanxi Province, China—association with asthma,  
608 rhinitis and rhinoconjunctivitis in high school students. *Microbiome*. 2021;9(1).
- 609 54. Weinstock DM, Brown AE. *Rhodococcus equi*: An Emerging Pathogen. *Clinical Infectious*  
610 *Diseases*. 2002;34(10):1379-85.
- 611 55. Wong KY, Chan, Y.C. and Wong, C.Y., . *Corynebacterium striatum* as an emerging  
612 pathogen. *Corynebacterium striatum* as an emerging pathogen. 2010;76(4):371-2.
- 613 56. De Bentzmann SaP, P. *The Pseudomonas aeruginosa* opportunistic pathogen and human  
614 infections. *Environmental microbiology*. 2011;13(7):1655-65.
- 615 57. Valkonen M, Täubel M, Pekkanen J, Tischer C, Rintala H, Zock J-P, et al. Microbial  
616 characteristics in homes of asthmatic and non-asthmatic adults in the ECRHS cohort. *Indoor Air*.  
617 2018;28(1):16-27.
- 618 58. Pujar NK, Premakshi HG, Ganeshkar MP, Kamanavalli CM. Biodegradation of Pesticides  
619 Used in Agriculture by Soil Microorganisms. *Enzymes for Pollutant Degradation: Springer Nature*  
620 *Singapore*; 2022. p. 213-35.
- 621 59. Fiocchi A, Burks W, Bahna SL, Bielory L, Boyle RJ, Cocco R, et al. Clinical Use of  
622 Probiotics in Pediatric Allergy (cuppa): A World Allergy Organization Position Paper. *World*  
623 *Allergy Organization Journal*. 2012;5(11):148-67.
- 624 60. Kau AL, Ahern PP, Griffin NW, Goodman AL, Gordon JI. Human nutrition, the gut  
625 microbiome and the immune system. *Nature*. 2011;474(7351):327-36.
- 626 61. Skillman LC, Evans PN, Strompl C, Joblin KN. 16S rDNA directed PCR primers and  
627 detection of methanogens in the bovine rumen. *Letters in Applied Microbiology*. 2006;42(3):222-8.
- 628 62. Hatti-Kaul R, Chen L, Dishisha T, Enshasy HE. Lactic acid bacteria: from starter cultures to  
629 producers of chemicals. *FEMS Microbiology Letters*. 2018;365(20).
- 630 63. Kraemer JG, Aebi S, Hilty M, Oppliger A. Nasal microbiota composition dynamics after  
631 occupational change in animal farmers suggest major shifts. *Sci Total Environ*. 2021;782:146842.
- 632 64. Shukla SK, Ye Z, Sandberg S, Reyes I, Fritsche TR, Keifer M. The nasal microbiota of dairy  
633 farmers is more complex than oral microbiota, reflects occupational exposure, and provides  
634 competition for staphylococci. *PLOS ONE*. 2017;12(8):e0183898.
- 635 65. Bull CT, De Boer SH, Denny TP, Firrao G, Fischer-Le Saux M, Saddler GS, et al. List of  
636 New Names of Plant Pathogenic Bacteria. *Journal of Plant Pathology*. 2012;94(1):21-7.
- 637 66. Goswami RS, Kistler HC. Heading for disaster: *Fusarium graminearum* on cereal crops.  
638 *Molecular Plant Pathology*. 2004;5(6):515-25.
- 639 67. Staats JJ, Feder I, Okwumabua O, Chengappa MM. *Streptococcus suis*: Past and Present.  
640 *Veterinary Research Communications*. 1997;21(6):381-407.
- 641 68. Bannoehr J, Guardabassi L. *Staphylococcus pseudintermedius* in the dog: taxonomy,  
642 diagnostics, ecology, epidemiology and pathogenicity. *Veterinary Dermatology*. 2012;23(4):253-e52.
- 643 69. Sepich-Poore GD, Zitvogel L, Straussman R, Hasty J, Wargo JA, Knight R. The microbiome  
644 and human cancer. *Science*. 2021;371(6536).
- 645 70. Dunn RR, Fierer N, Henley JB, Leff JW, Menninger HL. Home Life: Factors Structuring the  
646 Bacterial Diversity Found within and between Homes. *PLoS ONE*. 2013;8(5):e64133.
- 647  
648  
649

650 **Table 1. Characteristics of Study Population.** <sup>ϕ</sup> percentage based on full cohort versus within each  
 651 state. Exposures that were different by state of residence using Pearson’s chi-squared test (p<0.05):  
 652 Dogs, Living on a Farm, Crop Farming, Animal Farming, Working with Beef Cattle, Working with  
 653 Dairy Cattle, Working with Hogs.  
 654

| Category                    | Exposure                        | Total, N (% <sup>ϕ</sup> ) | NC, N (%)               | IA, N (%)               |
|-----------------------------|---------------------------------|----------------------------|-------------------------|-------------------------|
| <b>Total</b>                |                                 | 781                        | 247 (31.6) <sup>ϕ</sup> | 534 (68.4) <sup>ϕ</sup> |
| Demography                  | Male sex                        | 469 (60.1)                 | 140 (56.7)              | 329 (61.6)              |
|                             | Age in years, Mean (SD)         | 62 (11)                    | 63 (11)                 | 61 (11)                 |
| Presence of Indoor Pets     | Dogs or cats                    | 338 (43.3)                 | 118 (47.8)              | 220 (41.2)              |
|                             | Dogs                            | 248 (31.8)                 | 95 (38.5)               | 153 (28.7)              |
|                             | Cats                            | 165 (21.1)                 | 49 (19.8)               | 116 (21.7)              |
| Home Condition              | Home condition, higher category | 607 (77.8)                 | 183 (74.4)              | 424 (79.4)              |
|                             | Carpeting, carpeted surface     | 727 (93.3)                 | 223 (90.7)              | 504 (94.6)              |
| Current Farming Status      | Living on a farm                | 651 (83.4)                 | 194 (78.5)              | 457 (85.6)              |
|                             | Crop farming                    | 437 (55.9)                 | 85 (34.4)               | 352 (65.9)              |
|                             | Animal farming                  | 401 (51.3)                 | 98 (39.7)               | 303 (56.7)              |
|                             | Working with beef cattle        | 281 (35.9)                 | 65 (26.3)               | 216 (40.4)              |
|                             | Working with dairy cattle       | 48 (6.1)                   | 7 (2.8)                 | 41 (7.7)                |
|                             | Working with hogs               | 120 (15.4)                 | 18 (7.3)                | 102 (19.1)              |
|                             | Working with poultry            | 90 (11.5)                  | 35 (14.2)               | 55 (10.3)               |
| Season of Dust Collection   | Spring                          | 199 (25.5)                 | 68 (27.5)               | 131 (24.5)              |
|                             | Summer                          | 245 (31.4)                 | 69 (27.9)               | 176 (33)                |
|                             | Fall                            | 159 (20.4)                 | 46 (18.6)               | 113 (21.2)              |
|                             | Winter                          | 178 (22.8)                 | 64 (25.9)               | 114 (21.3)              |
| Current Asthma Status, Case |                                 | 296 (37.9)                 | 86 (34.8)               | 210 (39.3)              |

655



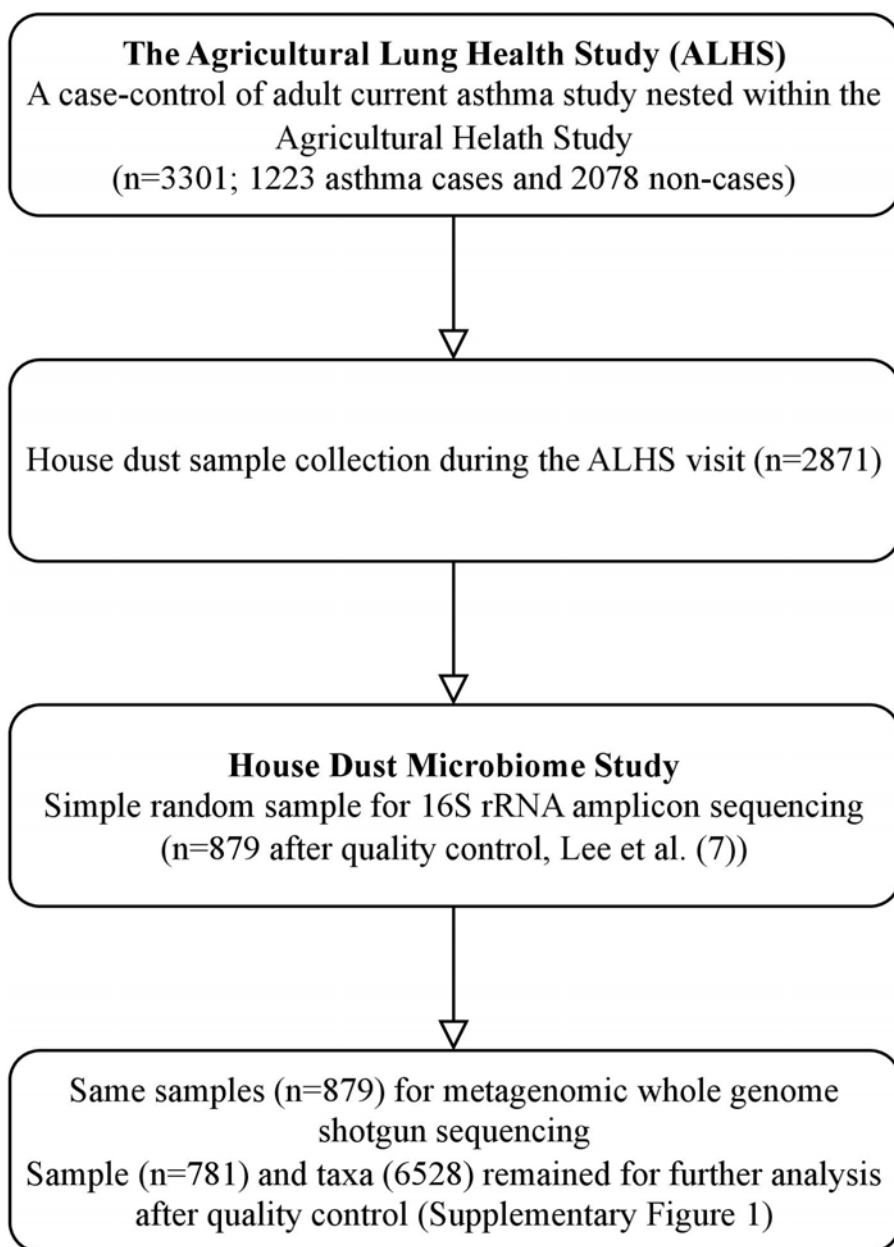

656  
657  
658  
659  
660

**Figure 1. Workflow of house dust microbiome study in WGS.** This workflow includes a summary of sample selection from the Agricultural Lung Health Study (ALHS) (n=3,301) to the house dust microbiome study with 16S (n=879) and WGS sequencing (n=781).

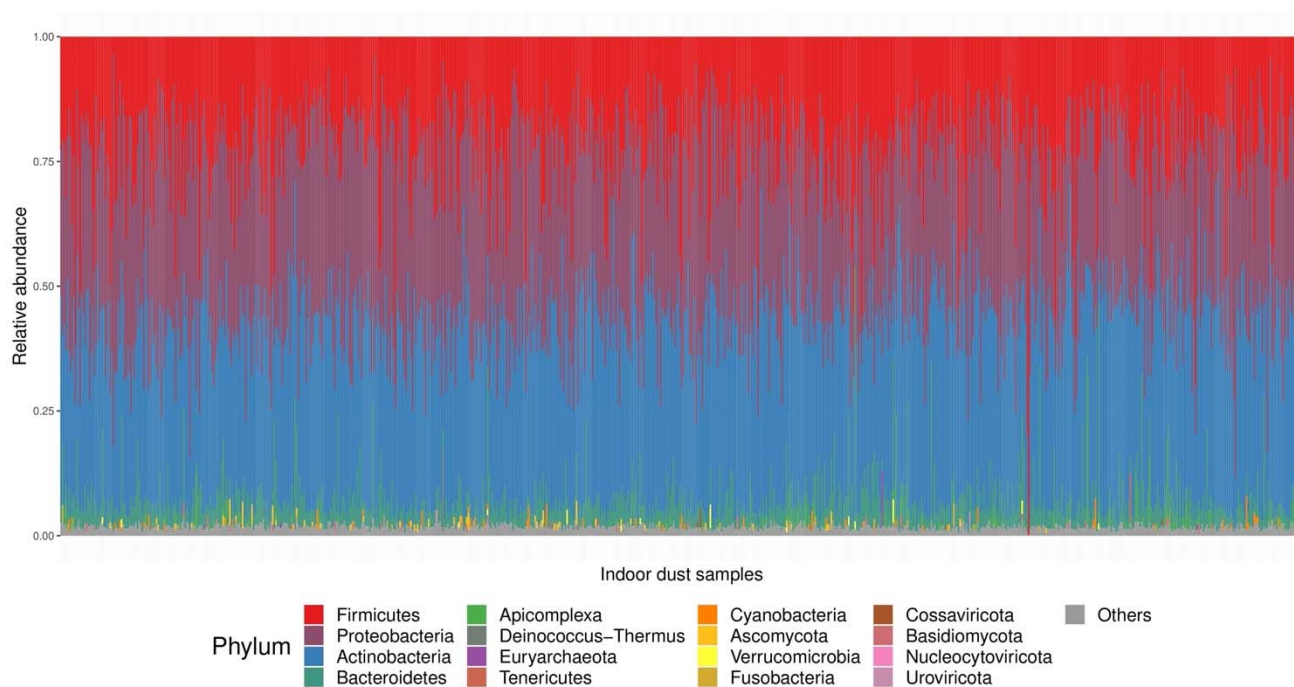

661  
662 **Figure 2. Relative abundance at the phylum level across all home dust samples.** The 16 phyla  
663 with relative abundance greater than 1% in at least one sample are color-coded according to the  
664 legend. All other phyla are represented in grey.

665  
666  
667  
668  
669  
670  
671  
672  
673

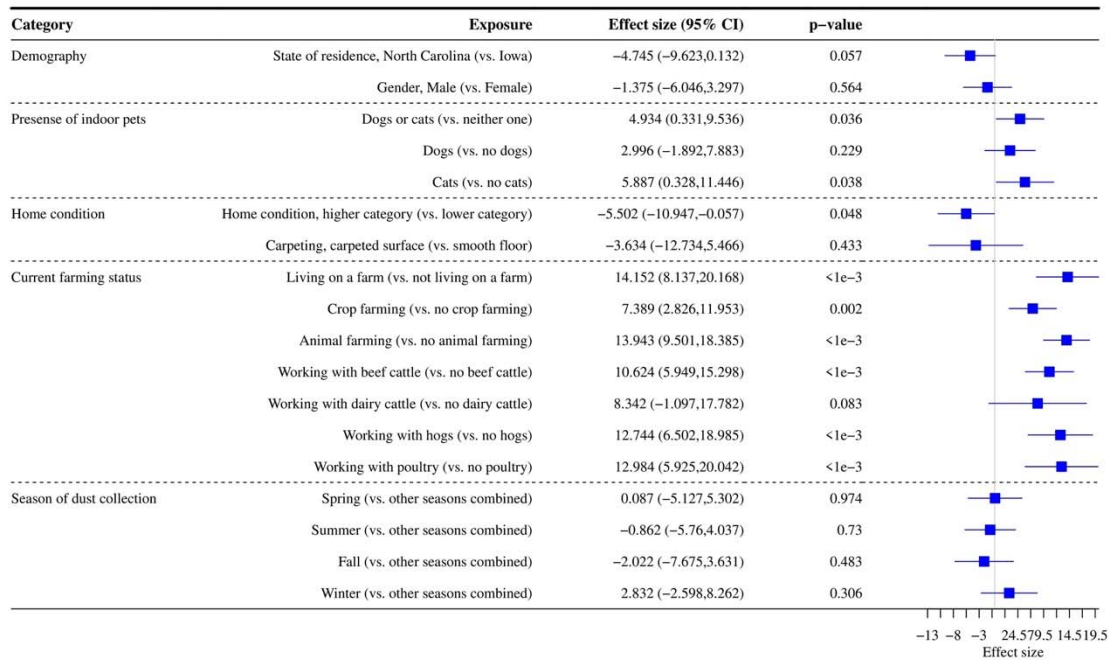

674  
 675 **Figure 3. Association between exposures and alpha diversity (Shannon index with exponential**  
 676 **transformation).** Data were rarefied to the minimum library size (1,003) across all samples. Effect  
 677 size refers to the coefficient from the regression model (difference in alpha diversity for yes versus  
 678 no for each exposure). The 95% confidence interval (CI) and p-value for each exposure from the  
 679 regression model are reported.

680  
 681  
 682  
 683  
 684  
 685  
 686  
 687  
 688  
 689  
 690  
 691  
 692  
 693

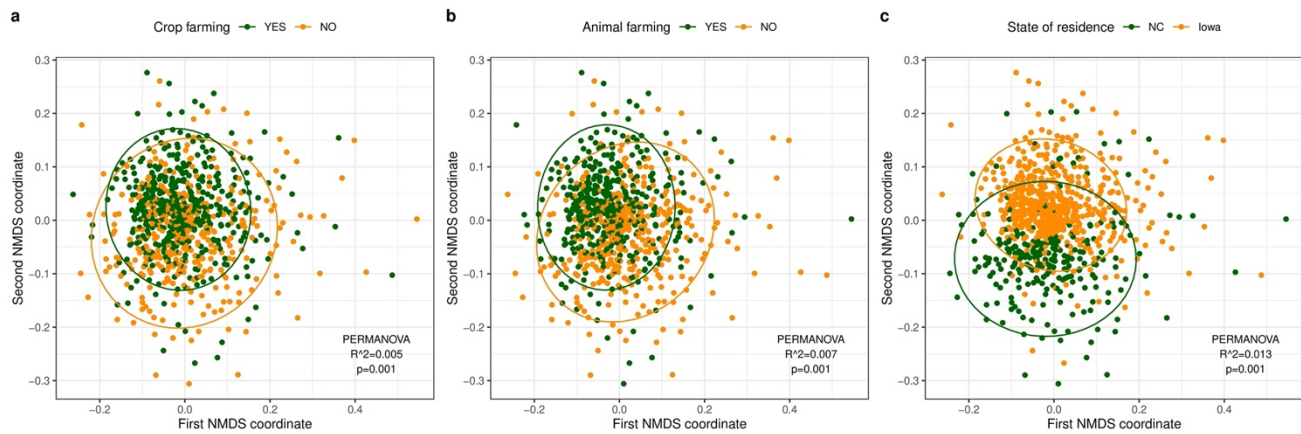

694  
695 **Figure 4. Non-metric multidimensional scaling (NMDS) analysis based on unweighted UniFrac**  
696 **distances for samples with different exposure levels. (a)** Crop farming (green: with crop farming,  
697 yellow: without crop farming). **(b)** Animal farming (green: with animal farming, yellow: without  
698 animal farming). **(c)** State of residence (green: North Carolina (NC), yellow: Iowa). The dust  
699 microbial community of each sample is represented by a single dot. The ellipse represents the 95%  
700 confidence interval for the centroids of each exposure level. R<sup>2</sup> values (percentage of variance  
701 explained by an exposure) and p-values from the PERMANOVA analysis are reported.



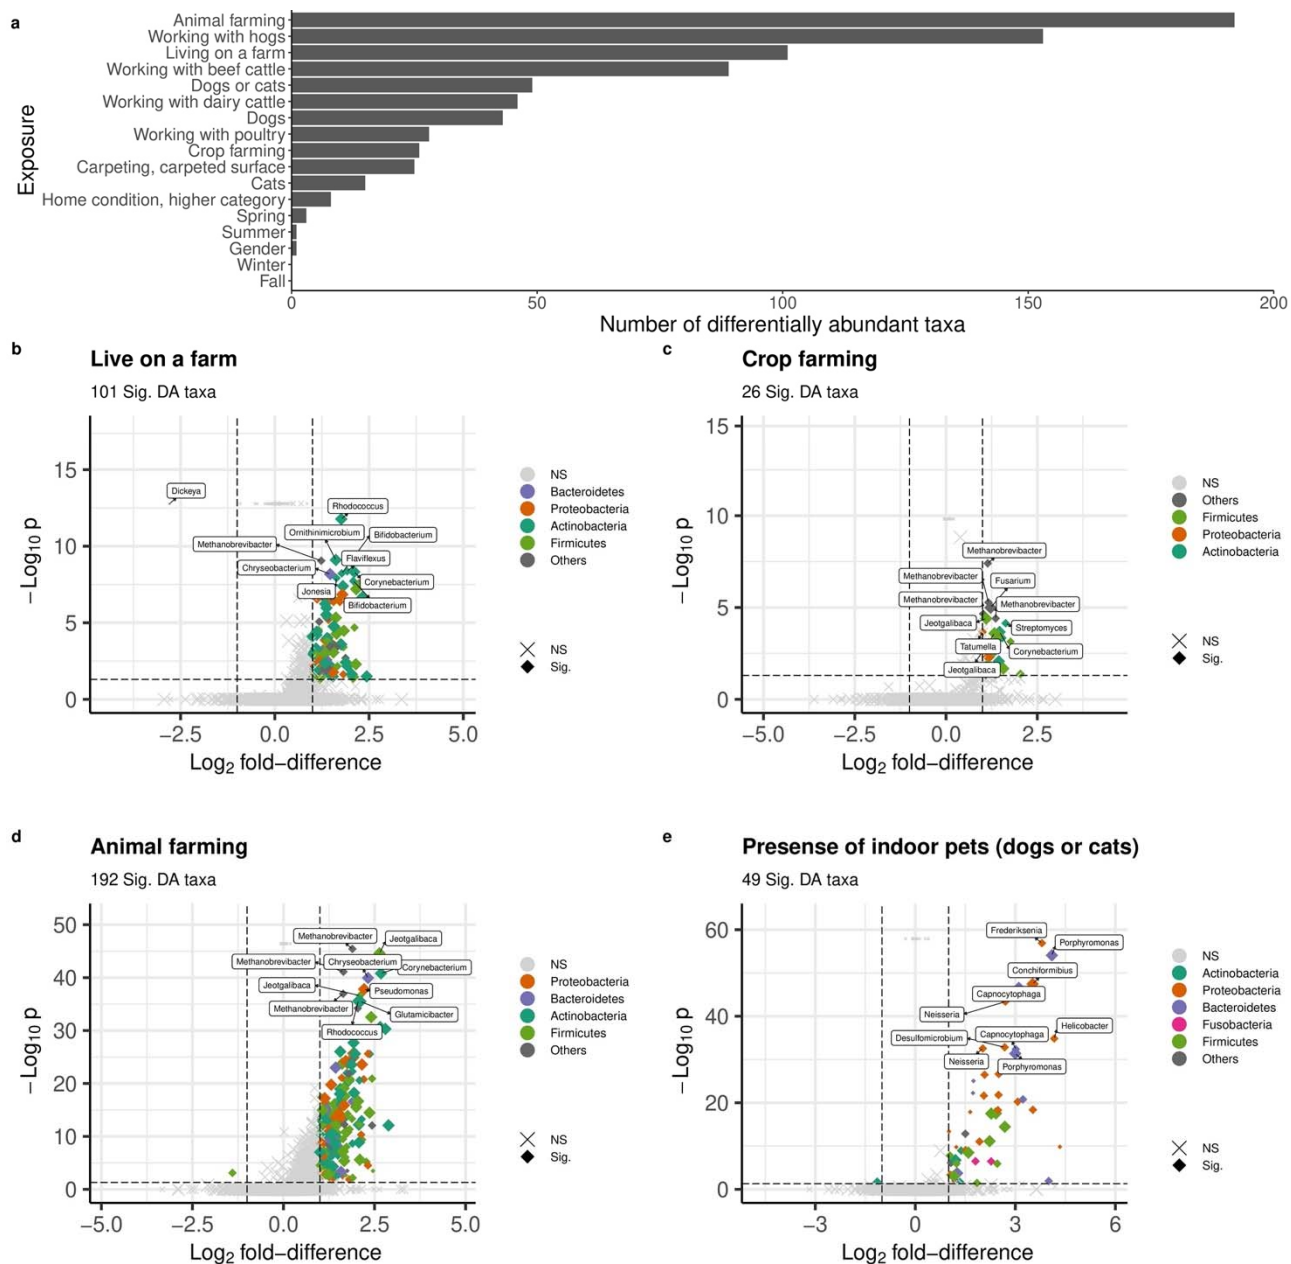

702  
 703 **Figure 5. Differentially abundant (DA) taxa related to individual exposure (FDR<0.05).** (a)  
 704 **Number of DA taxa.** (b)-(e) **Volcano plot** for (b) Presence of indoor pets, (c) Living on a farm, (d)  
 705 Crop farming, and (e) Animal farming. DA taxa are colored by phylum. The top 10 DA taxa with the  
 706 smallest adjusted p-values are labeled by genus. Dot size indicates the medium abundance level for  
 707 each taxon. a Benjamini-Hochberg method is used for FDR correction. lfd: log2 fold-difference.  
 708 Vertical and horizontal dash lines indicate the threshold of p value after FDR correction and lfd for  
 709 filtering DA taxa. Sig: DA taxa with  $p < 0.05$  after FDR correction (i.e.,  $\log_{10} p < 0.5$ ) and  $lfd > 1$  (or  
 710  $lfd < -1$ ); NS: non-DA taxa.

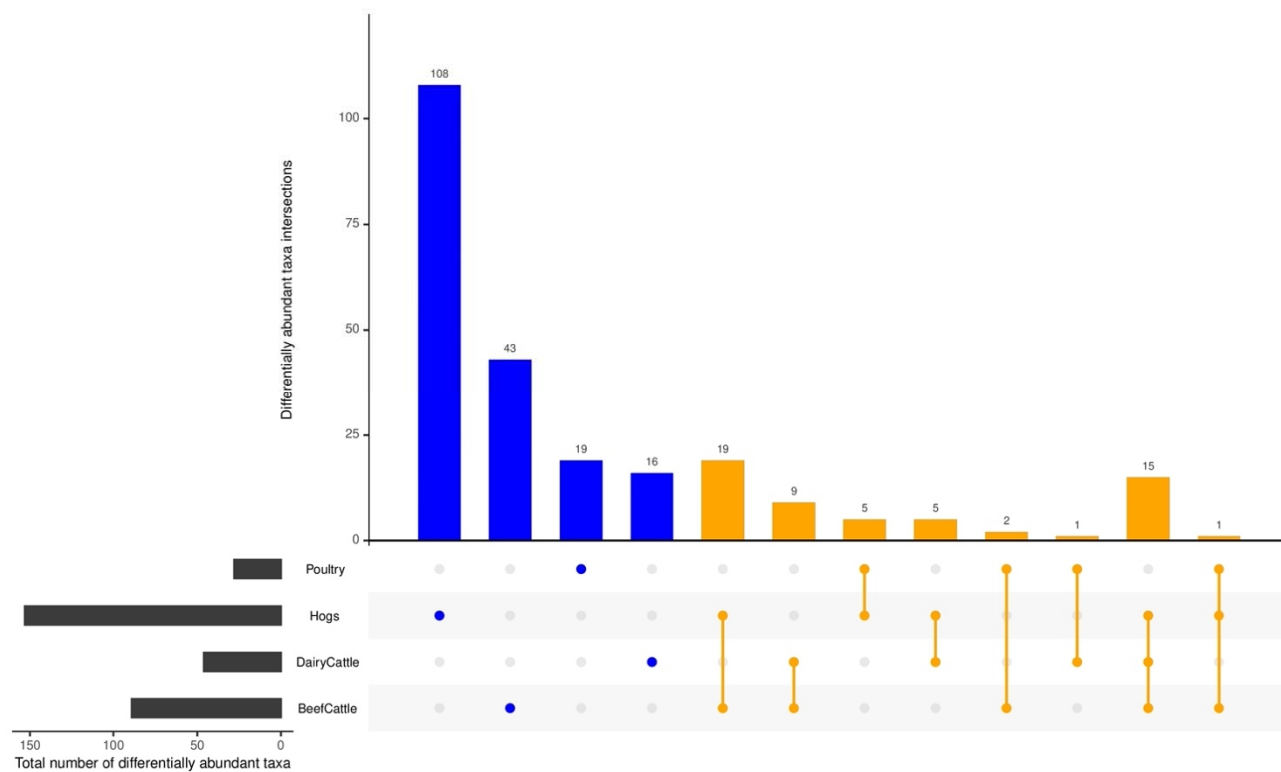

711  
 712 **Figure 6. Differentially abundant taxa related to various types of farming animal (FDR<0.05).**  
 713 Commonly identified differentially abundant taxa shared by farming animal types were aligned by  
 714 lines (orange), while differential taxa unique to farm animal type is identified by a single dot (blue).  
 715  
 716  
 717  
 718  
 719  
 720  
 721  
 722  
 723  
 724

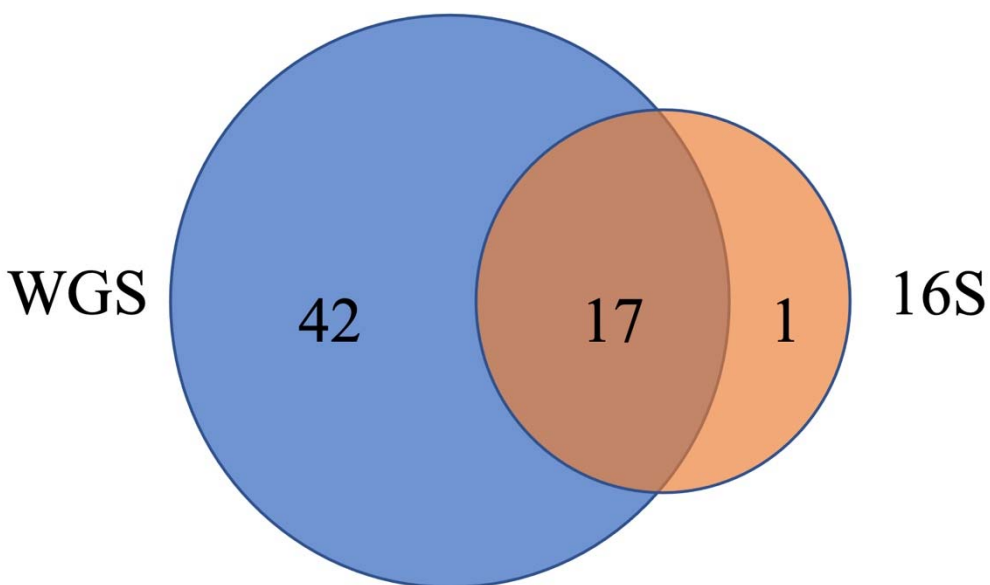

725  
726 **Figure 7.** Venn diagram of the number of phyla identified in WGS (blue) and 16S (orange). 17 phyla  
727 were identified by both methods (Supplementary Table S14).
